# Supplementary material
Source: publisher figshare collection journal article supplement (https://tandf.figshare.com/ndownloader/files/5575829)
Supplement: Supplementary file 1 [file 5575829]

## Sheet: GOs
GO-ID	GO category	Description	p-value	No. of supporting DEGs
Radium
GO:0070076	Biological process	histone lysine demethylation	2.418e-05	4
GO:0016577	Biological process	histone demethylation	7.701e-05	4
GO:0006482	Biological process	protein amino acid demethylation	9.7927e-05	4
GO:0008214	Biological process	protein amino acid dealkylation	9.7927e-05	4
GO:0034720	Biological process	histone H3-K4 demethylation	0.00014355	3
GO:0046292	Biological process	formaldehyde metabolic process	0.00014355	3
GO:0070988	Biological process	demethylation	0.00026819	4
GO:0019088	Biological process	immortalization of host cell by virus	0.00057825	2
GO:0020021	Biological process	immortalization of host cell	0.00057825	2
GO:0060574	Biological process	intestinal epithelial cell maturation	0.00057825	2
GO:0060575	Biological process	intestinal epithelial cell differentiation	0.00057825	2
GO:0060576	Biological process	intestinal epithelial cell development	0.00057825	2
GO:0006334	Biological process	nucleosome assembly	0.0010832	9
GO:0019087	Biological process	transformation of host cell by virus	0.0011458	2
GO:0009448	Biological process	gamma-aminobutyric acid metabolic process	0.0015878	3
GO:0031497	Biological process	chromatin assembly	0.0016278	9
GO:0006323	Biological process	DNA packaging	0.0016984	10
GO:0065004	Biological process	protein-DNA complex assembly	0.001747	9
GO:0002066	Biological process	columnar/cuboidal epithelial cell development	0.0018921	2
GO:0002069	Biological process	columnar/cuboidal epithelial cell maturation	0.0018921	2
GO:0046078	Biological process	dUMP metabolic process	0.0018921	2
GO:0006730	Biological process	one-carbon metabolic process	0.0019212	12
GO:0007568	Biological process	aging	0.0023093	10
GO:0071103	Biological process	DNA conformation change	0.002754	11
GO:0034728	Biological process	nucleosome organization	0.0032651	9
GO:0006325	Biological process	chromatin organization	0.0047133	18
GO:0008340	Biological process	determination of adult lifespan	0.0060702	6
GO:0006231	Biological process	dTMP biosynthetic process	0.006564	2
GO:0045668	Biological process	negative regulation of osteoblast differentiation	0.006564	2
GO:0046073	Biological process	dTMP metabolic process	0.006564	2
GO:0040029	Biological process	regulation of gene expression, epigenetic	0.0072715	8
GO:0010259	Biological process	multicellular organismal aging	0.0079976	6
GO:0002070	Biological process	epithelial cell maturation	0.0081297	2
GO:0009450	Biological process	gamma-aminobutyric acid catabolic process	0.0081297	2
GO:0032488	Biological process	Cdc42 protein signal transduction	0.0081297	2
GO:0051276	Biological process	chromosome organization	0.0095427	20
GO:0001955	Biological process	blood vessel maturation	0.0098452	2
GO:0009157	Biological process	deoxyribonucleoside monophosphate biosynthetic process	0.0098452	2
GO:0009176	Biological process	pyrimidine deoxyribonucleoside monophosphate metabolic process	0.0098452	2
GO:0009177	Biological process	pyrimidine deoxyribonucleoside monophosphate biosynthetic process	0.0098452	2
GO:0046683	Biological process	response to organophosphorus	0.010443	4
GO:0017085	Biological process	response to insecticide	0.011666	4
GO:0006342	Biological process	chromatin silencing	0.012977	4
GO:0045814	Biological process	negative regulation of gene expression, epigenetic	0.013666	4
GO:0060346	Biological process	bone trabecula formation	0.013708	2
GO:0000375	Biological process	RNA splicing, via transesterification reactions	0.013775	8
GO:0000743	Biological process	nuclear migration involved in conjugation with cellular fusion	0.013971	1
GO:0002320	Biological process	lymphoid progenitor cell differentiation	0.013971	1
GO:0002328	Biological process	pro-B cell differentiation	0.013971	1
GO:0016238	Biological process	chaperone-mediated autophagy	0.013971	1
GO:0018119	Biological process	peptidyl-cysteine S-nitrosylation	0.013971	1
GO:0030989	Biological process	dynein-driven meiotic oscillatory nuclear movement	0.013971	1
GO:0042769	Biological process	DNA damage response, detection of DNA damage	0.013971	1
GO:0043970	Biological process	histone H3-K9 acetylation	0.013971	1
GO:0045906	Biological process	negative regulation of vasoconstriction	0.013971	1
GO:0046293	Biological process	formaldehyde biosynthetic process	0.013971	1
GO:0046294	Biological process	formaldehyde catabolic process	0.013971	1
GO:0051797	Biological process	regulation of hair follicle development	0.013971	1
GO:0051798	Biological process	positive regulation of hair follicle development	0.013971	1
GO:0071392	Biological process	cellular response to estradiol stimulus	0.013971	1
GO:0001957	Biological process	intramembranous ossification	0.015846	2
GO:0009129	Biological process	pyrimidine nucleoside monophosphate metabolic process	0.015846	2
GO:0009130	Biological process	pyrimidine nucleoside monophosphate biosynthetic process	0.015846	2
GO:0009162	Biological process	deoxyribonucleoside monophosphate metabolic process	0.015846	2
GO:0009221	Biological process	pyrimidine deoxyribonucleotide biosynthetic process	0.015846	2
GO:0009265	Biological process	2'-deoxyribonucleotide biosynthetic process	0.015846	2
GO:0035094	Biological process	response to nicotine	0.015846	2
GO:0046385	Biological process	deoxyribose phosphate biosynthetic process	0.015846	2
GO:0007276	Biological process	gamete generation	0.01731	14
GO:0016458	Biological process	gene silencing	0.017402	6
GO:0001503	Biological process	ossification	0.017458	4
GO:0016570	Biological process	histone modification	0.017688	7
GO:0031100	Biological process	organ regeneration	0.019465	3
GO:0006022	Biological process	aminoglycan metabolic process	0.019651	9
GO:0045667	Biological process	regulation of osteoblast differentiation	0.020517	2
GO:0006333	Biological process	chromatin assembly or disassembly	0.021439	10
GO:0016569	Biological process	covalent chromatin modification	0.021619	7
GO:0002064	Biological process	epithelial cell development	0.022027	5
GO:0015991	Biological process	ATP hydrolysis coupled proton transport	0.022081	3
GO:0034622	Biological process	cellular macromolecular complex assembly	0.022737	17
GO:0030574	Biological process	collagen catabolic process	0.023041	2
GO:0001505	Biological process	regulation of neurotransmitter levels	0.023538	5
GO:0015988	Biological process	energy coupled proton transport, against electrochemical gradient	0.02488	3
GO:0002065	Biological process	columnar/cuboidal epithelial cell differentiation	0.025685	2
GO:0050708	Biological process	regulation of protein secretion	0.025685	2
GO:0060325	Biological process	face morphogenesis	0.025685	2
GO:0001501	Biological process	skeletal system development	0.025853	6
GO:0006305	Biological process	DNA alkylation	0.026348	3
GO:0006306	Biological process	DNA methylation	0.026348	3
GO:0031099	Biological process	regeneration	0.026855	4
GO:0000966	Biological process	RNA 5'-end processing	0.027747	1
GO:0002244	Biological process	hemopoietic progenitor cell differentiation	0.027747	1
GO:0002374	Biological process	cytokine secretion involved in immune response	0.027747	1
GO:0002739	Biological process	regulation of cytokine secretion involved in immune response	0.027747	1
GO:0002740	Biological process	negative regulation of cytokine secretion involved in immune response	0.027747	1
GO:0007290	Biological process	spermatid nucleus elongation	0.027747	1
GO:0010901	Biological process	regulation of very-low-density lipoprotein particle remodeling	0.027747	1
GO:0010903	Biological process	negative regulation of very-low-density lipoprotein particle remodeling	0.027747	1
GO:0016340	Biological process	calcium-dependent cell-matrix adhesion	0.027747	1
GO:0035376	Biological process	sterol import	0.027747	1
GO:0035382	Biological process	sterol transmembrane transport	0.027747	1
GO:0042634	Biological process	regulation of hair cycle	0.027747	1
GO:0042810	Biological process	pheromone metabolic process	0.027747	1
GO:0045019	Biological process	negative regulation of nitric oxide biosynthetic process	0.027747	1
GO:0050711	Biological process	negative regulation of interleukin-1 secretion	0.027747	1
GO:0050713	Biological process	negative regulation of interleukin-1 beta secretion	0.027747	1
GO:0060033	Biological process	anatomical structure regression	0.027747	1
GO:0070508	Biological process	cholesterol import	0.027747	1
GO:0070734	Biological process	histone H3-K27 methylation	0.027747	1
GO:0071347	Biological process	cellular response to interleukin-1	0.027747	1
GO:0071391	Biological process	cellular response to estrogen stimulus	0.027747	1
GO:0022406	Biological process	membrane docking	0.027861	3
GO:0060348	Biological process	bone development	0.027932	4
GO:0033059	Biological process	cellular pigmentation	0.028446	2
GO:0060343	Biological process	trabecula formation	0.028446	2
GO:0000398	Biological process	nuclear mRNA splicing, via spliceosome	0.028592	7
GO:0019953	Biological process	sexual reproduction	0.028718	14
GO:0000377	Biological process	RNA splicing, via transesterification reactions with bulged adenosine as nucleophile	0.030548	7
GO:0009219	Biological process	pyrimidine deoxyribonucleotide metabolic process	0.03132	2
GO:0042133	Biological process	neurotransmitter metabolic process	0.03132	2
GO:0044243	Biological process	multicellular organismal catabolic process	0.03132	2
GO:0048069	Biological process	eye pigmentation	0.03132	2
GO:0048200	Biological process	Golgi transport vesicle coating	0.03132	2
GO:0048205	Biological process	COPI coating of Golgi vesicle	0.03132	2
GO:0060323	Biological process	head morphogenesis	0.03132	2
GO:0060324	Biological process	face development	0.03132	2
GO:0006397	Biological process	mRNA processing	0.03141	11
GO:0010171	Biological process	body morphogenesis	0.032496	4
GO:0006200	Biological process	ATP catabolic process	0.032672	3
GO:0006030	Biological process	chitin metabolic process	0.033327	6
GO:0000302	Biological process	response to reactive oxygen species	0.034002	5
GO:0019048	Biological process	virus-host interaction	0.034303	2
GO:0048199	Biological process	vesicle targeting, to, from or within Golgi	0.034303	2
GO:0009128	Biological process	purine nucleoside monophosphate catabolic process	0.034366	3
GO:0009158	Biological process	ribonucleoside monophosphate catabolic process	0.034366	3
GO:0009169	Biological process	purine ribonucleoside monophosphate catabolic process	0.034366	3
GO:0001649	Biological process	osteoblast differentiation	0.037392	2
GO:0009263	Biological process	deoxyribonucleotide biosynthetic process	0.037392	2
GO:0009394	Biological process	2'-deoxyribonucleotide metabolic process	0.037392	2
GO:0019692	Biological process	deoxyribose phosphate metabolic process	0.037392	2
GO:0031122	Biological process	cytoplasmic microtubule organization	0.037392	2
GO:0048194	Biological process	Golgi vesicle budding	0.037392	2
GO:0009306	Biological process	protein secretion	0.037887	3
GO:0022607	Biological process	cellular component assembly	0.038965	30
GO:0006376	Biological process	mRNA splice site selection	0.040583	2
GO:0035088	Biological process	establishment or maintenance of apical/basal cell polarity	0.040583	2
GO:0044003	Biological process	modification by symbiont of host morphology or physiology	0.040583	2
GO:0006287	Biological process	base-excision repair, gap-filling	0.041331	1
GO:0006517	Biological process	protein deglycosylation	0.041331	1
GO:0007500	Biological process	mesodermal cell fate determination	0.041331	1
GO:0007634	Biological process	optokinetic behavior	0.041331	1
GO:0014912	Biological process	negative regulation of smooth muscle cell migration	0.041331	1
GO:0030473	Biological process	nuclear migration along microtubule	0.041331	1
GO:0032691	Biological process	negative regulation of interleukin-1 beta production	0.041331	1
GO:0032692	Biological process	negative regulation of interleukin-1 production	0.041331	1
GO:0034384	Biological process	high-density lipoprotein particle clearance	0.041331	1
GO:0043485	Biological process	endosome to pigment granule transport	0.041331	1
GO:0046184	Biological process	aldehyde biosynthetic process	0.041331	1
GO:0048757	Biological process	pigment granule maturation	0.041331	1
GO:0051291	Biological process	protein heterooligomerization	0.0435	3
GO:0030278	Biological process	regulation of ossification	0.043873	2
GO:0006304	Biological process	DNA modification	0.047459	3
GO:0034614	Biological process	cellular response to reactive oxygen species	0.047459	3
GO:0009125	Biological process	nucleoside monophosphate catabolic process	0.049503	3
GO:0008380	Biological process	RNA splicing	0.049701	10
GO:0044427	Cellular component	chromosomal part	0.0011769	22
GO:0032993	Cellular component	protein-DNA complex	0.0018116	9
GO:0000786	Cellular component	nucleosome	0.0023395	8
GO:0000785	Cellular component	chromatin	0.002578	16
GO:0005694	Cellular component	chromosome	0.0050024	23
GO:0005868	Cellular component	cytoplasmic dynein complex	0.0077649	2
GO:0015030	Cellular component	Cajal body	0.010495	3
GO:0000275	Cellular component	mitochondrial proton-transporting ATP synthase complex, catalytic core F(1)	0.012539	3
GO:0005681	Cellular component	spliceosomal complex	0.012855	8
GO:0005690	Cellular component	U4atac snRNP	0.015241	1
GO:0030286	Cellular component	dynein complex	0.018582	3
GO:0005882	Cellular component	intermediate filament	0.020089	4
GO:0035098	Cellular component	ESC/E(Z) complex	0.02413	2
GO:0045111	Cellular component	intermediate filament cytoskeleton	0.030053	4
GO:0031082	Cellular component	BLOC complex	0.03025	1
GO:0031083	Cellular component	BLOC-1 complex	0.03025	1
GO:0035062	Cellular component	omega speckle	0.03025	1
GO:0035086	Cellular component	flagellar axoneme	0.03025	1
GO:0070969	Cellular component	ULK1-ATG13-FIP200 complex	0.03025	1
GO:0045095	Cellular component	keratin filament	0.036716	2
GO:0000794	Cellular component	condensed nuclear chromosome	0.040611	3
GO:0005684	Cellular component	U2-type spliceosomal complex	0.045032	1
GO:0005687	Cellular component	U4 snRNP	0.045032	1
GO:0010445	Cellular component	nuclear dicing body	0.045032	1
GO:0031523	Cellular component	Myb complex	0.045032	1
GO:0044442	Cellular component	microtubule-based flagellum part	0.045032	1
GO:0031519	Cellular component	PcG protein complex	0.04746	2
GO:0045261	Cellular component	proton-transporting ATP synthase complex, catalytic core F(1)	0.049191	3
GO:0032453	Molecular function	histone demethylase activity (H3-K4 specific)	0.00019323	3
GO:0003867	Molecular function	4-aminobutyrate transaminase activity	0.00040464	3
GO:0046914	Molecular function	transition metal ion binding	0.00092283	73
GO:0008270	Molecular function	zinc ion binding	0.0010285	57
GO:0032452	Molecular function	histone demethylase activity	0.0017626	3
GO:0051903	Molecular function	S-(hydroxymethyl)glutathione dehydrogenase activity	0.0023068	2
GO:0043169	Molecular function	cation binding	0.0037668	104
GO:0032451	Molecular function	demethylase activity	0.0039537	3
GO:0051864	Molecular function	histone demethylase activity (H3-K36 specific)	0.0062634	2
GO:0004799	Molecular function	thymidylate synthase activity	0.0079711	2
GO:0042083	Molecular function	5,10-methylenetetrahydrofolate-dependent methyltransferase activity	0.0079711	2
GO:0030276	Molecular function	clathrin binding	0.0081214	3
GO:0046872	Molecular function	metal ion binding	0.011483	97
GO:0032934	Molecular function	sterol binding	0.013013	3
GO:0004757	Molecular function	sepiapterin reductase activity	0.015444	1
GO:0008111	Molecular function	alpha-methylacyl-CoA racemase activity	0.015444	1
GO:0008670	Molecular function	2,4-dienoyl-CoA reductase (NADPH) activity	0.015444	1
GO:0015667	Molecular function	site-specific DNA-methyltransferase (cytosine-N4-specific) activity	0.015444	1
GO:0034647	Molecular function	histone demethylase activity (H3-trimethyl-K4 specific)	0.015444	1
GO:0043992	Molecular function	histone acetyltransferase activity (H3-K9 specific)	0.015444	1
GO:0070513	Molecular function	death domain binding	0.015444	1
GO:0070990	Molecular function	snRNP binding	0.015444	1
GO:0017171	Molecular function	serine hydrolase activity	0.021285	14
GO:0015485	Molecular function	cholesterol binding	0.021873	2
GO:0004527	Molecular function	exonuclease activity	0.022167	7
GO:0008419	Molecular function	RNA lariat debranching enzyme activity	0.030649	1
GO:0010484	Molecular function	H3 histone acetyltransferase activity	0.030649	1
GO:0034191	Molecular function	apolipoprotein A-I receptor binding	0.030649	1
GO:0035100	Molecular function	ecdysone binding	0.030649	1
GO:0005515	Molecular function	protein binding	0.030834	145
GO:0005496	Molecular function	steroid binding	0.032166	3
GO:0005542	Molecular function	folic acid binding	0.03421	2
GO:0008483	Molecular function	transaminase activity	0.038709	5
GO:0008236	Molecular function	serine-type peptidase activity	0.041131	13
GO:0004037	Molecular function	allantoicase activity	0.045621	1
GO:0004772	Molecular function	sterol O-acyltransferase activity	0.045621	1
GO:0019215	Molecular function	intermediate filament binding	0.045621	1
GO:0030280	Molecular function	structural constituent of epidermis	0.045621	1
GO:0030971	Molecular function	receptor tyrosine kinase binding	0.045621	1
GO:0031994	Molecular function	insulin-like growth factor I binding	0.045621	1
GO:0032145	Molecular function	succinate-semialdehyde dehydrogenase binding	0.045621	1
GO:0034190	Molecular function	apolipoprotein receptor binding	0.045621	1
GO:0045505	Molecular function	dynein intermediate chain binding	0.045621	1
GO:0080007	Molecular function	S-nitrosoglutathione reductase activity	0.045621	1
GO:0016813	Molecular function	hydrolase activity, acting on carbon-nitrogen (but not peptide) bonds, in linear amidines	0.048621	2
Artifical produced water
GO:0006936	Biological process	muscle contraction	1.3232e-07	13
GO:0003012	Biological process	muscle system process	2.8196e-07	13
GO:0030239	Biological process	myofibril assembly	5.8053e-07	11
GO:0031032	Biological process	actomyosin structure organization	1.6425e-06	12
GO:0045214	Biological process	sarcomere organization	6.4011e-06	9
GO:0007010	Biological process	cytoskeleton organization	1.039e-05	29
GO:0070925	Biological process	organelle assembly	1.1444e-05	14
GO:0006874	Biological process	cellular calcium ion homeostasis	1.3696e-05	8
GO:0006941	Biological process	striated muscle contraction	1.379e-05	7
GO:0055074	Biological process	calcium ion homeostasis	1.8477e-05	8
GO:0010927	Biological process	cellular component assembly involved in morphogenesis	3.158e-05	11
GO:0055002	Biological process	striated muscle cell development	8.4951e-05	12
GO:0055001	Biological process	muscle cell development	8.8883e-05	12
GO:0002121	Biological process	inter-male aggressive behavior	9.1433e-05	5
GO:0070588	Biological process	calcium ion transmembrane transport	0.0001124	3
GO:0002118	Biological process	aggressive behavior	0.00016631	5
GO:0014866	Biological process	skeletal myofibril assembly	0.00017122	6
GO:0030005	Biological process	cellular di-, tri-valent inorganic cation homeostasis	0.00017596	10
GO:0048646	Biological process	anatomical structure formation involved in morphogenesis	0.00018384	20
GO:0051146	Biological process	striated muscle cell differentiation	0.00022488	12
GO:0051560	Biological process	mitochondrial calcium ion homeostasis	0.00022495	2
GO:0051561	Biological process	elevation of mitochondrial calcium ion concentration	0.00022495	2
GO:0030855	Biological process	epithelial cell differentiation	0.00025604	15
GO:0006875	Biological process	cellular metal ion homeostasis	0.00034314	10
GO:0007291	Biological process	sperm individualization	0.00035318	4
GO:0007443	Biological process	Malpighian tubule morphogenesis	0.00039993	5
GO:0072002	Biological process	Malpighian tubule development	0.00039993	5
GO:0055066	Biological process	di-, tri-valent inorganic cation homeostasis	0.00041003	10
GO:0043473	Biological process	pigmentation	0.00043029	6
GO:0048619	Biological process	embryonic hindgut morphogenesis	0.00044705	5
GO:0016319	Biological process	mushroom body development	0.00049822	5
GO:0061061	Biological process	muscle structure development	0.00050208	16
GO:0042692	Biological process	muscle cell differentiation	0.00066799	12
GO:0032941	Biological process	secretion by tissue	0.00066809	3
GO:0055065	Biological process	metal ion homeostasis	0.000765	10
GO:0045200	Biological process	establishment of neuroblast polarity	0.00076976	4
GO:0003015	Biological process	heart process	0.0008229	5
GO:0060047	Biological process	heart contraction	0.0008229	5
GO:0007589	Biological process	body fluid secretion	0.00085888	3
GO:0048468	Biological process	cell development	0.00086653	30
GO:0040012	Biological process	regulation of locomotion	0.00096435	8
GO:0007442	Biological process	hindgut morphogenesis	0.00098924	5
GO:0030010	Biological process	establishment of cell polarity	0.0010812	5
GO:0000910	Biological process	cytokinesis	0.001112	9
GO:0007163	Biological process	establishment or maintenance of cell polarity	0.001112	9
GO:0051301	Biological process	cell division	0.0011722	17
GO:0016203	Biological process	muscle attachment	0.0011793	5
GO:0031036	Biological process	myosin II filament assembly	0.0012896	4
GO:0070509	Biological process	calcium ion import	0.001323	2
GO:0030003	Biological process	cellular cation homeostasis	0.0013901	10
GO:0030336	Biological process	negative regulation of cell migration	0.0014503	4
GO:0046663	Biological process	dorsal closure, leading edge cell differentiation	0.0016244	4
GO:0010631	Biological process	epithelial cell migration	0.0016897	7
GO:0090132	Biological process	epithelium migration	0.0016897	7
GO:0031038	Biological process	myosin II filament assembly or disassembly	0.0018126	4
GO:0035026	Biological process	leading edge cell differentiation	0.0018126	4
GO:0040013	Biological process	negative regulation of locomotion	0.0018126	4
GO:0003013	Biological process	circulatory system process	0.0018668	7
GO:0008015	Biological process	blood circulation	0.0018668	7
GO:0045196	Biological process	establishment or maintenance of neuroblast polarity	0.0020153	4
GO:0051271	Biological process	negative regulation of cellular component movement	0.0020153	4
GO:0060429	Biological process	epithelium development	0.0021736	19
GO:0046541	Biological process	saliva secretion	0.0021831	2
GO:0002504	Biological process	antigen processing and presentation of peptide or polysaccharide antigen via MHC class II	0.0023179	3
GO:0006937	Biological process	regulation of muscle contraction	0.0024667	4
GO:0007395	Biological process	dorsal closure, spreading of leading edge cells	0.0024667	4
GO:0006911	Biological process	phagocytosis, engulfment	0.0024856	7
GO:0090130	Biological process	tissue migration	0.0024856	7
GO:0007399	Biological process	nervous system development	0.0025783	28
GO:0003008	Biological process	system process	0.0027743	24
GO:0046664	Biological process	dorsal closure, amnioserosa morphology change	0.0029832	4
GO:0003073	Biological process	regulation of systemic arterial blood pressure	0.0031671	3
GO:0048066	Biological process	developmental pigmentation	0.0032671	4
GO:0055057	Biological process	neuroblast division	0.0032671	4
GO:0055059	Biological process	asymmetric neuroblast division	0.0032671	4
GO:0006816	Biological process	calcium ion transport	0.0032796	6
GO:0042401	Biological process	cellular biogenic amine biosynthetic process	0.0034368	8
GO:0009851	Biological process	auxin biosynthetic process	0.0035679	22
GO:0090257	Biological process	regulation of muscle system process	0.0035689	4
GO:0030036	Biological process	actin cytoskeleton organization	0.0037664	14
GO:0035317	Biological process	imaginal disc-derived wing hair organization	0.0038016	5
GO:0009888	Biological process	tissue development	0.0038546	28
GO:0007392	Biological process	initiation of dorsal closure	0.0038891	4
GO:0008258	Biological process	head involution	0.0038891	4
GO:0035017	Biological process	cuticle pattern formation	0.0038891	4
GO:0035316	Biological process	non-sensory hair organization	0.0040447	5
GO:0032989	Biological process	cellular component morphogenesis	0.0041444	22
GO:0009850	Biological process	auxin metabolic process	0.0042061	22
GO:0006761	Biological process	dihydrofolate biosynthetic process	0.004494	2
GO:0046452	Biological process	dihydrofolate metabolic process	0.004494	2
GO:0007427	Biological process	epithelial cell migration, open tracheal system	0.0045867	4
GO:0030241	Biological process	skeletal muscle myosin thick filament assembly	0.0045867	4
GO:0048103	Biological process	somatic stem cell division	0.0045867	4
GO:0071688	Biological process	striated muscle myosin thick filament assembly	0.0045867	4
GO:0030334	Biological process	regulation of cell migration	0.0046373	6
GO:0009653	Biological process	anatomical structure morphogenesis	0.004758	42
GO:0009190	Biological process	cyclic nucleotide biosynthetic process	0.0048404	5
GO:0034599	Biological process	cellular response to oxidative stress	0.0048404	5
GO:0009913	Biological process	epidermal cell differentiation	0.0049054	8
GO:0031034	Biological process	myosin filament assembly	0.0049651	4
GO:0007049	Biological process	cell cycle	0.0051869	32
GO:0042446	Biological process	hormone biosynthetic process	0.0054548	22
GO:0030029	Biological process	actin filament-based process	0.0055834	14
GO:0001977	Biological process	renal system process involved in regulation of blood volume	0.0059327	2
GO:0002027	Biological process	regulation of heart rate	0.0059327	2
GO:0003071	Biological process	renal system process involved in regulation of systemic arterial blood pressure	0.0059327	2
GO:0003091	Biological process	renal water homeostasis	0.0059327	2
GO:0003097	Biological process	renal water transport	0.0059327	2
GO:0010596	Biological process	negative regulation of endothelial cell migration	0.0059327	2
GO:0050891	Biological process	multicellular organismal water homeostasis	0.0059327	2
GO:0043066	Biological process	negative regulation of apoptosis	0.0059754	12
GO:0007349	Biological process	cellularization	0.0062244	4
GO:0031033	Biological process	myosin filament assembly or disassembly	0.0062244	4
GO:0007276	Biological process	gamete generation	0.0066157	16
GO:0016477	Biological process	cell migration	0.0066755	12
GO:0008544	Biological process	epidermis development	0.0069815	9
GO:0043588	Biological process	skin development	0.0069815	9
GO:0030154	Biological process	cell differentiation	0.0073371	38
GO:0043069	Biological process	negative regulation of programmed cell death	0.0074389	12
GO:0009187	Biological process	cyclic nucleotide metabolic process	0.0074954	5
GO:0022600	Biological process	digestive system process	0.0075207	3
GO:0010633	Biological process	negative regulation of epithelial cell migration	0.0075524	2
GO:0033363	Biological process	secretory granule organization	0.0075524	2
GO:0042335	Biological process	cuticle development	0.0078864	5
GO:0048565	Biological process	digestive tract development	0.0081934	6
GO:0051270	Biological process	regulation of cellular component movement	0.0081934	6
GO:0060548	Biological process	negative regulation of cell death	0.0082694	12
GO:0007286	Biological process	spermatid development	0.0082913	5
GO:0051705	Biological process	behavioral interaction between organisms	0.0082913	5
GO:0070838	Biological process	divalent metal ion transport	0.0085303	6
GO:0032502	Biological process	developmental process	0.0089724	74
GO:0007398	Biological process	ectoderm development	0.0091597	9
GO:0055080	Biological process	cation homeostasis	0.0092123	10
GO:0007405	Biological process	neuroblast proliferation	0.0093423	4
GO:0003014	Biological process	renal system process	0.0093473	2
GO:0030157	Biological process	pancreatic juice secretion	0.0093473	2
GO:0030318	Biological process	melanocyte differentiation	0.0093473	2
GO:0060048	Biological process	cardiac muscle contraction	0.0093473	2
GO:0001667	Biological process	ameboidal cell migration	0.0094084	7
GO:0006909	Biological process	phagocytosis	0.0097246	7
GO:0048870	Biological process	cell motility	0.0099454	12
GO:0051674	Biological process	localization of cell	0.0099454	12
GO:0060562	Biological process	epithelial tube morphogenesis	0.010365	6
GO:0002119	Biological process	nematode larval development	0.01038	7
GO:0048515	Biological process	spermatid differentiation	0.010533	5
GO:0048546	Biological process	digestive tract morphogenesis	0.010533	5
GO:0015669	Biological process	gas transport	0.010571	4
GO:0009309	Biological process	amine biosynthetic process	0.010591	17
GO:0006897	Biological process	endocytosis	0.011037	13
GO:0010324	Biological process	membrane invagination	0.011037	13
GO:0010591	Biological process	regulation of lamellipodium assembly	0.011059	3
GO:0042445	Biological process	hormone metabolic process	0.011069	23
GO:0048513	Biological process	organ development	0.011154	46
GO:0034614	Biological process	cellular response to reactive oxygen species	0.011223	4
GO:0030240	Biological process	skeletal muscle thin filament assembly	0.011312	2
GO:0019953	Biological process	sexual reproduction	0.012105	16
GO:0007517	Biological process	muscle organ development	0.012389	11
GO:0051235	Biological process	maintenance of location	0.012917	6
GO:0060191	Biological process	regulation of lipase activity	0.013132	3
GO:0032501	Biological process	multicellular organismal process	0.013348	79
GO:0003208	Biological process	cardiac ventricle morphogenesis	0.013441	2
GO:0003229	Biological process	ventricular cardiac muscle tissue development	0.013441	2
GO:0006726	Biological process	eye pigment biosynthetic process	0.013441	2
GO:0042441	Biological process	eye pigment metabolic process	0.013441	2
GO:0043324	Biological process	pigment metabolic process involved in developmental pigmentation	0.013441	2
GO:0043474	Biological process	pigment metabolic process involved in pigmentation	0.013441	2
GO:0051918	Biological process	negative regulation of fibrinolysis	0.013441	2
GO:0055010	Biological process	ventricular cardiac muscle tissue morphogenesis	0.013441	2
GO:0060563	Biological process	neuroepithelial cell differentiation	0.013441	2
GO:0007420	Biological process	brain development	0.013995	9
GO:0005978	Biological process	glycogen biosynthetic process	0.014246	3
GO:0010817	Biological process	regulation of hormone levels	0.014388	24
GO:0051336	Biological process	regulation of hydrolase activity	0.014481	10
GO:0035315	Biological process	hair cell differentiation	0.014928	5
GO:0000349	Biological process	generation of catalytic spliceosome for first transesterification step	0.015021	1
GO:0000393	Biological process	spliceosomal conformational changes to generate catalytic conformation	0.015021	1
GO:0001550	Biological process	ovarian cumulus expansion	0.015021	1
GO:0002468	Biological process	dendritic cell antigen processing and presentation	0.015021	1
GO:0002577	Biological process	regulation of antigen processing and presentation	0.015021	1
GO:0002578	Biological process	negative regulation of antigen processing and presentation	0.015021	1
GO:0002580	Biological process	regulation of antigen processing and presentation of peptide or polysaccharide antigen via MHC class II	0.015021	1
GO:0002581	Biological process	negative regulation of antigen processing and presentation of peptide or polysaccharide antigen via MHC class II	0.015021	1
GO:0002604	Biological process	regulation of dendritic cell antigen processing and presentation	0.015021	1
GO:0002605	Biological process	negative regulation of dendritic cell antigen processing and presentation	0.015021	1
GO:0007189	Biological process	activation of adenylate cyclase activity by G-protein signaling pathway	0.015021	1
GO:0008343	Biological process	adult feeding behavior	0.015021	1
GO:0010459	Biological process	negative regulation of heart rate	0.015021	1
GO:0010578	Biological process	regulation of adenylate cyclase activity involved in G-protein signaling pathway	0.015021	1
GO:0010579	Biological process	positive regulation of adenylate cyclase activity by G-protein signaling pathway	0.015021	1
GO:0010748	Biological process	negative regulation of plasma membrane long-chain fatty acid transport	0.015021	1
GO:0010749	Biological process	regulation of nitric oxide mediated signal transduction	0.015021	1
GO:0010751	Biological process	negative regulation of nitric oxide mediated signal transduction	0.015021	1
GO:0010752	Biological process	regulation of cGMP-mediated signaling	0.015021	1
GO:0010754	Biological process	negative regulation of cGMP-mediated signaling	0.015021	1
GO:0010759	Biological process	positive regulation of macrophage chemotaxis	0.015021	1
GO:0010881	Biological process	regulation of cardiac muscle contraction by regulation of the release of sequestered calcium ion	0.015021	1
GO:0015949	Biological process	nucleobase, nucleoside and nucleotide interconversion	0.015021	1
GO:0015953	Biological process	pyrimidine nucleotide interconversion	0.015021	1
GO:0015955	Biological process	pyrimidine deoxyribonucleotide interconversion	0.015021	1
GO:0019227	Biological process	neuronal action potential propagation	0.015021	1
GO:0030511	Biological process	positive regulation of transforming growth factor beta receptor signaling pathway	0.015021	1
GO:0031584	Biological process	activation of phospholipase D activity	0.015021	1
GO:0032695	Biological process	negative regulation of interleukin-12 production	0.015021	1
GO:0032891	Biological process	negative regulation of organic acid transport	0.015021	1
GO:0042535	Biological process	positive regulation of tumor necrosis factor biosynthetic process	0.015021	1
GO:0043537	Biological process	negative regulation of blood vessel endothelial cell migration	0.015021	1
GO:0045636	Biological process	positive regulation of melanocyte differentiation	0.015021	1
GO:0048087	Biological process	positive regulation of developmental pigmentation	0.015021	1
GO:0048165	Biological process	fused antrum stage	0.015021	1
GO:0050942	Biological process	positive regulation of pigment cell differentiation	0.015021	1
GO:0051797	Biological process	regulation of hair follicle development	0.015021	1
GO:0051798	Biological process	positive regulation of hair follicle development	0.015021	1
GO:0070889	Biological process	platelet alpha granule organization	0.015021	1
GO:0071674	Biological process	mononuclear cell migration	0.015021	1
GO:0071675	Biological process	regulation of mononuclear cell migration	0.015021	1
GO:0055123	Biological process	digestive system development	0.015357	6
GO:0006942	Biological process	regulation of striated muscle contraction	0.015728	2
GO:0030104	Biological process	water homeostasis	0.015728	2
GO:0050878	Biological process	regulation of body fluid levels	0.01588	6
GO:0007275	Biological process	multicellular organismal development	0.016052	66
GO:0006928	Biological process	cellular component movement	0.016241	19
GO:0016044	Biological process	cellular membrane organization	0.016774	17
GO:0007051	Biological process	spindle organization	0.016833	7
GO:0030182	Biological process	neuron differentiation	0.017238	17
GO:0061024	Biological process	membrane organization	0.017238	17
GO:0033554	Biological process	cellular response to stress	0.017699	22
GO:0015671	Biological process	oxygen transport	0.017899	3
GO:0032313	Biological process	regulation of Rab GTPase activity	0.017899	3
GO:0032483	Biological process	regulation of Rab protein signal transduction	0.017899	3
GO:0070301	Biological process	cellular response to hydrogen peroxide	0.017899	3
GO:0003231	Biological process	cardiac ventricle development	0.01817	2
GO:0010594	Biological process	regulation of endothelial cell migration	0.01817	2
GO:0031639	Biological process	plasminogen activation	0.01817	2
GO:0033206	Biological process	cytokinesis after meiosis	0.01817	2
GO:0043462	Biological process	regulation of ATPase activity	0.01817	2
GO:0007281	Biological process	germ cell development	0.018487	8
GO:0006904	Biological process	vesicle docking involved in exocytosis	0.019222	3
GO:0032482	Biological process	Rab protein signal transduction	0.019222	3
GO:0030030	Biological process	cell projection organization	0.019259	15
GO:0072089	Biological process	stem cell proliferation	0.020132	4
GO:0006873	Biological process	cellular ion homeostasis	0.020503	10
GO:0006545	Biological process	glycine biosynthetic process	0.020759	2
GO:0030194	Biological process	positive regulation of blood coagulation	0.020759	2
GO:0031424	Biological process	keratinization	0.020759	2
GO:0045766	Biological process	positive regulation of angiogenesis	0.020759	2
GO:0051004	Biological process	regulation of lipoprotein lipase activity	0.020759	2
GO:0051917	Biological process	regulation of fibrinolysis	0.020759	2
GO:0048813	Biological process	dendrite morphogenesis	0.021174	5
GO:0019725	Biological process	cellular homeostasis	0.021292	15
GO:0055082	Biological process	cellular chemical homeostasis	0.021317	10
GO:0006576	Biological process	cellular biogenic amine metabolic process	0.021981	11
GO:0030216	Biological process	keratinocyte differentiation	0.022026	3
GO:0048731	Biological process	system development	0.02203	53
GO:0043933	Biological process	macromolecular complex subunit organization	0.022122	31
GO:0072001	Biological process	renal system development	0.022761	5
GO:0022402	Biological process	cell cycle process	0.023031	22
GO:0007586	Biological process	digestion	0.023507	3
GO:0048609	Biological process	reproductive process in a multicellular organism	0.023636	16
GO:0006916	Biological process	anti-apoptosis	0.023845	6
GO:0050678	Biological process	regulation of epithelial cell proliferation	0.024204	4
GO:0022412	Biological process	reproductive cellular process in multicellular organism	0.024348	10
GO:0032504	Biological process	multicellular organism reproduction	0.024585	16
GO:0033205	Biological process	cell cycle cytokinesis	0.02504	3
GO:0048278	Biological process	vesicle docking	0.02504	3
GO:0060491	Biological process	regulation of cell projection assembly	0.02504	3
GO:0001937	Biological process	negative regulation of endothelial cell proliferation	0.026364	2
GO:0050820	Biological process	positive regulation of coagulation	0.026364	2
GO:0050931	Biological process	pigment cell differentiation	0.026364	2
GO:0019882	Biological process	antigen processing and presentation	0.026627	3
GO:0045765	Biological process	regulation of angiogenesis	0.026627	3
GO:0048869	Biological process	cellular developmental process	0.026752	38
GO:0043067	Biological process	regulation of programmed cell death	0.0274	17
GO:0048878	Biological process	chemical homeostasis	0.027761	13
GO:0051216	Biological process	cartilage development	0.028266	3
GO:0048699	Biological process	generation of neurons	0.028415	17
GO:0002064	Biological process	epithelial cell development	0.028915	5
GO:0006140	Biological process	regulation of nucleotide metabolic process	0.029033	7
GO:0002065	Biological process	columnar/cuboidal epithelial cell differentiation	0.02937	2
GO:0031638	Biological process	zymogen activation	0.02937	2
GO:0045684	Biological process	positive regulation of epidermis development	0.02937	2
GO:0055008	Biological process	cardiac muscle tissue morphogenesis	0.02937	2
GO:0060415	Biological process	muscle tissue morphogenesis	0.02937	2
GO:0016192	Biological process	vesicle-mediated transport	0.029374	20
GO:0048856	Biological process	anatomical structure development	0.029546	62
GO:0002164	Biological process	larval development	0.029732	7
GO:0010941	Biological process	regulation of cell death	0.029812	17
GO:0001502	Biological process	cartilage condensation	0.029817	1
GO:0006256	Biological process	UDP catabolic process	0.029817	1
GO:0008292	Biological process	acetylcholine biosynthetic process	0.029817	1
GO:0009140	Biological process	pyrimidine nucleoside diphosphate catabolic process	0.029817	1
GO:0009193	Biological process	pyrimidine ribonucleoside diphosphate metabolic process	0.029817	1
GO:0009195	Biological process	pyrimidine ribonucleoside diphosphate catabolic process	0.029817	1
GO:0009222	Biological process	pyrimidine ribonucleotide catabolic process	0.029817	1
GO:0010746	Biological process	regulation of plasma membrane long-chain fatty acid transport	0.029817	1
GO:0010755	Biological process	regulation of plasminogen activation	0.029817	1
GO:0010757	Biological process	negative regulation of plasminogen activation	0.029817	1
GO:0010882	Biological process	regulation of cardiac muscle contraction by calcium ion signaling	0.029817	1
GO:0015911	Biological process	plasma membrane long-chain fatty acid transport	0.029817	1
GO:0032512	Biological process	regulation of protein phosphatase type 2B activity	0.029817	1
GO:0032513	Biological process	negative regulation of protein phosphatase type 2B activity	0.029817	1
GO:0032905	Biological process	transforming growth factor-beta1 production	0.029817	1
GO:0032908	Biological process	regulation of transforming growth factor-beta1 production	0.029817	1
GO:0032914	Biological process	positive regulation of transforming growth factor-beta1 production	0.029817	1
GO:0033120	Biological process	positive regulation of RNA splicing	0.029817	1
GO:0034763	Biological process	negative regulation of transmembrane transport	0.029817	1
GO:0034766	Biological process	negative regulation of ion transmembrane transport	0.029817	1
GO:0040037	Biological process	negative regulation of fibroblast growth factor receptor signaling pathway	0.029817	1
GO:0042533	Biological process	tumor necrosis factor biosynthetic process	0.029817	1
GO:0042534	Biological process	regulation of tumor necrosis factor biosynthetic process	0.029817	1
GO:0042634	Biological process	regulation of hair cycle	0.029817	1
GO:0043030	Biological process	regulation of macrophage activation	0.029817	1
GO:0043032	Biological process	positive regulation of macrophage activation	0.029817	1
GO:0045109	Biological process	intermediate filament organization	0.029817	1
GO:0045634	Biological process	regulation of melanocyte differentiation	0.029817	1
GO:0046048	Biological process	UDP metabolic process	0.029817	1
GO:0050932	Biological process	regulation of pigment cell differentiation	0.029817	1
GO:0051791	Biological process	medium-chain fatty acid metabolic process	0.029817	1
GO:0051793	Biological process	medium-chain fatty acid catabolic process	0.029817	1
GO:0071622	Biological process	regulation of granulocyte chemotaxis	0.029817	1
GO:0017145	Biological process	stem cell division	0.029946	4
GO:0032507	Biological process	maintenance of protein location in cell	0.029946	4
GO:0051179	Biological process	localization	0.030766	90
GO:0048729	Biological process	tissue morphogenesis	0.030863	11
GO:0007283	Biological process	spermatogenesis	0.031682	8
GO:0051591	Biological process	response to cAMP	0.031701	3
GO:0033059	Biological process	cellular pigmentation	0.032505	2
GO:0022406	Biological process	membrane docking	0.033496	3
GO:0000226	Biological process	microtubule cytoskeleton organization	0.033551	10
GO:0048232	Biological process	male gamete generation	0.034381	8
GO:0006974	Biological process	response to DNA damage stimulus	0.034404	15
GO:0006898	Biological process	receptor-mediated endocytosis	0.034953	5
GO:0042730	Biological process	fibrinolysis	0.035765	2
GO:0048069	Biological process	eye pigmentation	0.035765	2
GO:0050673	Biological process	epithelial cell proliferation	0.036428	4
GO:0042398	Biological process	cellular amino acid derivative biosynthetic process	0.036716	11
GO:0051651	Biological process	maintenance of location in cell	0.037814	4
GO:0009790	Biological process	embryonic development	0.038771	22
GO:0003205	Biological process	cardiac chamber development	0.039145	2
GO:0003206	Biological process	cardiac chamber morphogenesis	0.039145	2
GO:0006596	Biological process	polyamine biosynthetic process	0.039145	2
GO:0006833	Biological process	water transport	0.039145	2
GO:0016525	Biological process	negative regulation of angiogenesis	0.039145	2
GO:0034762	Biological process	regulation of transmembrane transport	0.039145	2
GO:0034765	Biological process	regulation of ion transmembrane transport	0.039145	2
GO:0008217	Biological process	regulation of blood pressure	0.039193	3
GO:0030032	Biological process	lamellipodium assembly	0.039193	3
GO:0051346	Biological process	negative regulation of hydrolase activity	0.039193	3
GO:0007266	Biological process	Rho protein signal transduction	0.040676	4
GO:0015674	Biological process	di-, tri-valent inorganic cation transport	0.040721	7
GO:0045727	Biological process	positive regulation of translation	0.041195	3
GO:0007052	Biological process	mitotic spindle organization	0.041718	5
GO:0009166	Biological process	nucleotide catabolic process	0.042594	8
GO:0016575	Biological process	histone deacetylation	0.042641	2
GO:0051240	Biological process	positive regulation of multicellular organismal process	0.043379	7
GO:0042542	Biological process	response to hydrogen peroxide	0.043657	4
GO:0000302	Biological process	response to reactive oxygen species	0.044136	5
GO:0007417	Biological process	central nervous system development	0.044259	10
GO:0001547	Biological process	antral ovarian follicle growth	0.044391	1
GO:0001993	Biological process	regulation of systemic arterial blood pressure by norepinephrine-epinephrine	0.044391	1
GO:0001996	Biological process	positive regulation of heart rate by epinephrine-norepinephrine	0.044391	1
GO:0003062	Biological process	regulation of heart rate by chemical signal	0.044391	1
GO:0003065	Biological process	positive regulation of heart rate by epinephrine	0.044391	1
GO:0003321	Biological process	positive regulation of blood pressure by epinephrine-norepinephrine	0.044391	1
GO:0003416	Biological process	endochondral bone growth	0.044391	1
GO:0003417	Biological process	growth plate cartilage development	0.044391	1
GO:0006287	Biological process	base-excision repair, gap-filling	0.044391	1
GO:0007077	Biological process	mitotic nuclear envelope disassembly	0.044391	1
GO:0007190	Biological process	activation of adenylate cyclase activity	0.044391	1
GO:0007263	Biological process	nitric oxide mediated signal transduction	0.044391	1
GO:0009191	Biological process	ribonucleoside diphosphate catabolic process	0.044391	1
GO:0010460	Biological process	positive regulation of heart rate	0.044391	1
GO:0010758	Biological process	regulation of macrophage chemotaxis	0.044391	1
GO:0010762	Biological process	regulation of fibroblast migration	0.044391	1
GO:0010763	Biological process	positive regulation of fibroblast migration	0.044391	1
GO:0014912	Biological process	negative regulation of smooth muscle cell migration	0.044391	1
GO:0021548	Biological process	pons development	0.044391	1
GO:0021754	Biological process	facial nucleus development	0.044391	1
GO:0022605	Biological process	oogenesis stage	0.044391	1
GO:0032119	Biological process	sequestering of zinc ion	0.044391	1
GO:0033599	Biological process	regulation of mammary gland epithelial cell proliferation	0.044391	1
GO:0043536	Biological process	positive regulation of blood vessel endothelial cell migration	0.044391	1
GO:0043652	Biological process	engulfment of apoptotic cell	0.044391	1
GO:0071604	Biological process	transforming growth factor-beta production	0.044391	1
GO:0071634	Biological process	regulation of transforming growth factor-beta production	0.044391	1
GO:0071636	Biological process	positive regulation of transforming growth factor-beta production	0.044391	1
GO:0022008	Biological process	neurogenesis	0.044774	17
GO:0005977	Biological process	glycogen metabolic process	0.045349	3
GO:0006112	Biological process	energy reserve metabolic process	0.045349	3
GO:0045786	Biological process	negative regulation of cell cycle	0.045376	5
GO:0010632	Biological process	regulation of epithelial cell migration	0.046249	2
GO:0030858	Biological process	positive regulation of epithelial cell differentiation	0.046249	2
GO:0043542	Biological process	endothelial cell migration	0.046249	2
GO:0048644	Biological process	muscle organ morphogenesis	0.046249	2
GO:0016358	Biological process	dendrite development	0.046637	5
GO:0045185	Biological process	maintenance of protein location	0.046758	4
GO:0048812	Biological process	neuron projection morphogenesis	0.047081	10
GO:0009887	Biological process	organ morphogenesis	0.047995	19
GO:0042060	Biological process	wound healing	0.048001	6
GO:0048667	Biological process	cell morphogenesis involved in neuron differentiation	0.048537	10
GO:0001655	Biological process	urogenital system development	0.04922	5
GO:0005856	Cellular component	cytoskeleton	8.1015e-14	59
GO:0044430	Cellular component	cytoskeletal part	1.0854e-08	42
GO:0030016	Cellular component	myofibril	1.3346e-07	14
GO:0015629	Cellular component	actin cytoskeleton	1.4079e-07	22
GO:0043292	Cellular component	contractile fiber	2.3535e-07	14
GO:0030017	Cellular component	sarcomere	4.7038e-07	13
GO:0044449	Cellular component	contractile fiber part	8.8286e-07	13
GO:0043228	Cellular component	non-membrane-bounded organelle	3.26e-06	94
GO:0043232	Cellular component	intracellular non-membrane-bounded organelle	3.26e-06	94
GO:0070603	Cellular component	SWI/SNF-type complex	7.7982e-05	7
GO:0031011	Cellular component	Ino80 complex	9.9789e-05	4
GO:0005884	Cellular component	actin filament	0.00010413	8
GO:0016459	Cellular component	myosin complex	0.00014411	10
GO:0044454	Cellular component	nuclear chromosome part	0.00020978	10
GO:0030018	Cellular component	Z disc	0.00024802	7
GO:0033202	Cellular component	DNA helicase complex	0.00030811	4
GO:0031674	Cellular component	I band	0.00033807	7
GO:0005859	Cellular component	muscle myosin complex	0.00080648	5
GO:0000228	Cellular component	nuclear chromosome	0.000951	10
GO:0016460	Cellular component	myosin II complex	0.0009816	5
GO:0005865	Cellular component	striated muscle thin filament	0.0011058	4
GO:0005863	Cellular component	striated myosin muscle thick filament	0.0018121	4
GO:0045298	Cellular component	tubulin complex	0.0022309	8
GO:0000780	Cellular component	condensed nuclear chromosome, centromeric region	0.0023236	3
GO:0000790	Cellular component	nuclear chromatin	0.0027025	6
GO:0016585	Cellular component	chromatin remodeling complex	0.0027498	7
GO:0009925	Cellular component	basal plasma membrane	0.0032339	3
GO:0015630	Cellular component	microtubule cytoskeleton	0.0038292	20
GO:0005882	Cellular component	intermediate filament	0.0046142	5
GO:0045179	Cellular component	apical cortex	0.0048243	4
GO:0032154	Cellular component	cleavage furrow	0.0052411	4
GO:0045178	Cellular component	basal part of cell	0.0056386	3
GO:0000776	Cellular component	kinetochore	0.0058827	5
GO:0032155	Cellular component	cell division site part	0.0071484	4
GO:0032982	Cellular component	myosin filament	0.0071484	4
GO:0045111	Cellular component	intermediate filament cytoskeleton	0.0077905	5
GO:0000794	Cellular component	condensed nuclear chromosome	0.0082535	4
GO:0016580	Cellular component	Sin3 complex	0.0084995	2
GO:0033017	Cellular component	sarcoplasmic reticulum membrane	0.0084995	2
GO:0070822	Cellular component	Sin3-type complex	0.0084995	2
GO:0000775	Cellular component	chromosome, centromeric region	0.0088341	6
GO:0031672	Cellular component	A band	0.0088457	4
GO:0032153	Cellular component	cell division site	0.0088457	4
GO:0044427	Cellular component	chromosomal part	0.0092991	20
GO:0000777	Cellular component	condensed chromosome kinetochore	0.011908	3
GO:0044448	Cellular component	cell cortex part	0.012667	6
GO:0016529	Cellular component	sarcoplasmic reticulum	0.013031	3
GO:0005862	Cellular component	muscle thin filament tropomyosin	0.015098	2
GO:0030121	Cellular component	AP-1 adaptor complex	0.015098	2
GO:0000243	Cellular component	commitment complex	0.015972	1
GO:0030478	Cellular component	actin cap	0.015972	1
GO:0043033	Cellular component	isoamylase complex	0.015972	1
GO:0000779	Cellular component	condensed chromosome, centromeric region	0.016752	3
GO:0016528	Cellular component	sarcoplasm	0.016752	3
GO:0005861	Cellular component	troponin complex	0.017657	2
GO:0030658	Cellular component	transport vesicle membrane	0.019159	4
GO:0016581	Cellular component	NuRD complex	0.020385	2
GO:0005811	Cellular component	lipid particle	0.020837	9
GO:0030130	Cellular component	clathrin coat of trans-Golgi network vesicle	0.025797	3
GO:0005938	Cellular component	cell cortex	0.028673	7
GO:0005694	Cellular component	chromosome	0.028976	21
GO:0012510	Cellular component	trans-Golgi network transport vesicle membrane	0.029288	3
GO:0031082	Cellular component	BLOC complex	0.031689	1
GO:0031083	Cellular component	BLOC-1 complex	0.031689	1
GO:0005875	Cellular component	microtubule associated complex	0.032641	6
GO:0030660	Cellular component	Golgi-associated vesicle membrane	0.033401	4
GO:0031091	Cellular component	platelet alpha granule	0.043732	2
GO:0000502	Cellular component	proteasome complex	0.045916	7
GO:0005684	Cellular component	U2-type spliceosomal complex	0.047156	1
GO:0031523	Cellular component	Myb complex	0.047156	1
GO:0008307	Molecular function	structural constituent of muscle	4.6874e-06	8
GO:0005218	Molecular function	intracellular ligand-gated calcium channel activity	3.8803e-05	3
GO:0005219	Molecular function	ryanodine-sensitive calcium-release channel activity	3.8803e-05	3
GO:0005200	Molecular function	structural constituent of cytoskeleton	3.9525e-05	9
GO:0008092	Molecular function	cytoskeletal protein binding	7.653e-05	23
GO:0005217	Molecular function	intracellular ligand-gated ion channel activity	9.7966e-05	4
GO:0015278	Molecular function	calcium-release channel activity	0.00031085	3
GO:0017022	Molecular function	myosin binding	0.00044823	6
GO:0032027	Molecular function	myosin light chain binding	0.0030173	4
GO:0004373	Molecular function	glycogen (starch) synthase activity	0.0036163	2
GO:0005523	Molecular function	tropomyosin binding	0.0042727	3
GO:0008236	Molecular function	serine-type peptidase activity	0.0053211	16
GO:0017171	Molecular function	serine hydrolase activity	0.0056335	16
GO:0004146	Molecular function	dihydrofolate reductase activity	0.0066097	2
GO:0005540	Molecular function	hyaluronic acid binding	0.0066097	2
GO:0003774	Molecular function	motor activity	0.0070488	8
GO:0001784	Molecular function	phosphotyrosine binding	0.0084094	2
GO:0030276	Molecular function	clathrin binding	0.0087598	3
GO:0015085	Molecular function	calcium ion transmembrane transporter activity	0.009941	4
GO:0005515	Molecular function	protein binding	0.010502	153
GO:0005262	Molecular function	calcium channel activity	0.010691	3
GO:0004252	Molecular function	serine-type endopeptidase activity	0.010835	13
GO:0005344	Molecular function	oxygen transporter activity	0.012849	3
GO:0003779	Molecular function	actin binding	0.01469	12
GO:0004586	Molecular function	ornithine decarboxylase activity	0.015878	1
GO:0031702	Molecular function	type 1 angiotensin receptor binding	0.015878	1
GO:0031752	Molecular function	D5 dopamine receptor binding	0.015878	1
GO:0035013	Molecular function	myosuppressin receptor activity	0.015878	1
GO:0048603	Molecular function	fibroblast growth factor 2 binding	0.015878	1
GO:0070052	Molecular function	collagen V binding	0.015878	1
GO:0070513	Molecular function	death domain binding	0.015878	1
GO:0043015	Molecular function	gamma-tubulin binding	0.017473	2
GO:0015631	Molecular function	tubulin binding	0.020988	6
GO:0005097	Molecular function	Rab GTPase activator activity	0.02381	3
GO:0015082	Molecular function	di-, tri-valent inorganic cation transmembrane transporter activity	0.025329	6
GO:0005509	Molecular function	calcium ion binding	0.025508	18
GO:0045309	Molecular function	protein phosphorylated amino acid binding	0.026054	2
GO:0004175	Molecular function	endopeptidase activity	0.027537	24
GO:0016849	Molecular function	phosphorus-oxygen lyase activity	0.030703	3
GO:0003726	Molecular function	double-stranded RNA adenosine deaminase activity	0.031505	1
GO:0005534	Molecular function	galactose binding	0.031505	1
GO:0030750	Molecular function	putrescine N-methyltransferase activity	0.031505	1
GO:0050431	Molecular function	transforming growth factor beta binding	0.031505	1
GO:0050780	Molecular function	dopamine receptor binding	0.031505	1
GO:0070991	Molecular function	medium-chain-acyl-CoA dehydrogenase activity	0.031505	1
GO:0004407	Molecular function	histone deacetylase activity	0.035989	2
GO:0005198	Molecular function	structural molecule activity	0.039172	29
GO:0033558	Molecular function	protein deacetylase activity	0.039576	2
GO:0005375	Molecular function	copper ion transmembrane transporter activity	0.043292	2
GO:0004018	Molecular function	N6-(1,2-dicarboxyethyl)AMP AMP-lyase (fumarate-forming) activity	0.046884	1
GO:0004766	Molecular function	spermidine synthase activity	0.046884	1
GO:0005294	Molecular function	neutral L-amino acid secondary active transmembrane transporter activity	0.046884	1
GO:0015375	Molecular function	glycine:sodium symporter activity	0.046884	1
GO:0016153	Molecular function	urocanate hydratase activity	0.046884	1
GO:0017108	Molecular function	5'-flap endonuclease activity	0.046884	1
GO:0019215	Molecular function	intermediate filament binding	0.046884	1
GO:0030347	Molecular function	syntaxin-2 binding	0.046884	1
GO:0030348	Molecular function	syntaxin-3 binding	0.046884	1
GO:0031701	Molecular function	angiotensin receptor binding	0.046884	1
GO:0045134	Molecular function	uridine-diphosphatase activity	0.046884	1
GO:0070051	Molecular function	fibrinogen binding	0.046884	1
GO:0070626	Molecular function	(S)-2-(5-amino-1-(5-phospho-D-ribosyl)imidazole-4-carboxamido)succinate AMP-lyase (fumarate-forming) activity	0.046884	1
GO:0005539	Molecular function	glycosaminoglycan binding	0.049593	3
Radium + Artifical produced water
GO:0048856	Biological process	anatomical structure development	8.8146e-06	94
GO:0032502	Biological process	developmental process	3.205e-05	103
GO:0010171	Biological process	body morphogenesis	3.2685e-05	9
GO:0009653	Biological process	anatomical structure morphogenesis	3.5711e-05	59
GO:0007275	Biological process	multicellular organismal development	0.00012089	92
GO:0032501	Biological process	multicellular organismal process	0.00013042	108
GO:0048869	Biological process	cellular developmental process	0.00031707	55
GO:0030154	Biological process	cell differentiation	0.00039091	51
GO:0048731	Biological process	system development	0.00091902	72
GO:0040035	Biological process	hermaphrodite genitalia development	0.0012292	6
GO:0007163	Biological process	establishment or maintenance of cell polarity	0.0013891	10
GO:0008340	Biological process	determination of adult lifespan	0.0016037	8
GO:0060346	Biological process	bone trabecula formation	0.0016082	3
GO:0048705	Biological process	skeletal system morphogenesis	0.0017837	5
GO:0001957	Biological process	intramembranous ossification	0.0020186	3
GO:0010259	Biological process	multicellular organismal aging	0.002314	8
GO:0045766	Biological process	positive regulation of angiogenesis	0.0024885	3
GO:0048646	Biological process	anatomical structure formation involved in morphogenesis	0.0026896	20
GO:0009792	Biological process	embryonic development ending in birth or egg hatching	0.0027635	16
GO:0050789	Biological process	regulation of biological process	0.0028847	155
GO:0019510	Biological process	S-adenosylhomocysteine catabolic process	0.003351	2
GO:0005978	Biological process	glycogen biosynthetic process	0.003568	4
GO:0048513	Biological process	organ development	0.0035777	58
GO:0065004	Biological process	protein-DNA complex assembly	0.0037731	10
GO:0006936	Biological process	muscle contraction	0.0039042	8
GO:0034622	Biological process	cellular macromolecular complex assembly	0.0040509	24
GO:0002164	Biological process	larval development	0.0040545	10
GO:0060325	Biological process	face morphogenesis	0.0042815	3
GO:0006323	Biological process	DNA packaging	0.0045628	11
GO:0048806	Biological process	genitalia development	0.0046057	6
GO:0007399	Biological process	nervous system development	0.004876	32
GO:0060343	Biological process	trabecula formation	0.0050145	3
GO:0003012	Biological process	muscle system process	0.0057442	8
GO:0060323	Biological process	head morphogenesis	0.0058187	3
GO:0060324	Biological process	face development	0.0058187	3
GO:0042542	Biological process	response to hydrogen peroxide	0.0061204	6
GO:0060351	Biological process	cartilage development involved in endochondral bone morphogenesis	0.0068648	2
GO:0006334	Biological process	nucleosome assembly	0.0073804	9
GO:0042168	Biological process	heme metabolic process	0.0076626	4
GO:0009887	Biological process	organ morphogenesis	0.0078222	26
GO:0009886	Biological process	post-embryonic morphogenesis	0.008046	12
GO:0007548	Biological process	sex differentiation	0.0081748	9
GO:0002165	Biological process	instar larval or pupal development	0.0082591	12
GO:0065007	Biological process	biological regulation	0.0084369	174
GO:0001525	Biological process	angiogenesis	0.0087572	7
GO:0001736	Biological process	establishment of planar polarity	0.0088103	6
GO:0023034	Biological process	intracellular signaling pathway	0.0089139	32
GO:0051216	Biological process	cartilage development	0.009027	4
GO:0045103	Biological process	intermediate filament-based process	0.0090406	2
GO:0045104	Biological process	intermediate filament cytoskeleton organization	0.0090406	2
GO:0043933	Biological process	macromolecular complex subunit organization	0.0094658	39
GO:0022602	Biological process	ovulation cycle process	0.0097775	3
GO:0002119	Biological process	nematode larval development	0.010189	8
GO:0000302	Biological process	response to reactive oxygen species	0.010329	7
GO:0060429	Biological process	epithelium development	0.010468	20
GO:0031497	Biological process	chromatin assembly	0.010612	9
GO:0042698	Biological process	ovulation cycle	0.010959	3
GO:0033363	Biological process	secretory granule organization	0.011481	2
GO:0007164	Biological process	establishment of tissue polarity	0.011714	6
GO:0006471	Biological process	protein amino acid ADP-ribosylation	0.01222	3
GO:0022603	Biological process	regulation of anatomical structure morphogenesis	0.012906	12
GO:0022607	Biological process	cellular component assembly	0.013086	41
GO:0003015	Biological process	heart process	0.013103	4
GO:0060047	Biological process	heart contraction	0.013103	4
GO:0048729	Biological process	tissue morphogenesis	0.01345	14
GO:0032989	Biological process	cellular component morphogenesis	0.013474	24
GO:0032963	Biological process	collagen metabolic process	0.013561	3
GO:0044259	Biological process	multicellular organismal macromolecule metabolic process	0.013561	3
GO:0016043	Biological process	cellular component organization	0.013627	88
GO:0001738	Biological process	morphogenesis of a polarized epithelium	0.013988	6
GO:0034329	Biological process	cell junction assembly	0.014038	4
GO:0010812	Biological process	negative regulation of cell-substrate adhesion	0.014175	2
GO:0043271	Biological process	negative regulation of ion transport	0.014175	2
GO:0060322	Biological process	head development	0.014981	3
GO:0008033	Biological process	tRNA processing	0.015234	6
GO:0030030	Biological process	cell projection organization	0.015351	18
GO:0007568	Biological process	aging	0.016411	10
GO:0000187	Biological process	activation of MAPK activity	0.016483	3
GO:0006783	Biological process	heme biosynthetic process	0.016483	3
GO:0005977	Biological process	glycogen metabolic process	0.017092	4
GO:0006112	Biological process	energy reserve metabolic process	0.017092	4
GO:0000289	Biological process	nuclear-transcribed mRNA poly(A) tail shortening	0.017113	2
GO:0001955	Biological process	blood vessel maturation	0.017113	2
GO:0030011	Biological process	maintenance of cell polarity	0.017113	2
GO:0060349	Biological process	bone morphogenesis	0.017113	2
GO:0060350	Biological process	endochondral bone morphogenesis	0.017113	2
GO:0048699	Biological process	generation of neurons	0.017208	21
GO:0040010	Biological process	positive regulation of growth rate	0.017243	6
GO:0030182	Biological process	neuron differentiation	0.01792	20
GO:0040009	Biological process	regulation of growth rate	0.017952	6
GO:0006486	Biological process	protein amino acid glycosylation	0.018407	8
GO:0043413	Biological process	macromolecule glycosylation	0.018407	8
GO:0048707	Biological process	instar larval or pupal morphogenesis	0.018632	10
GO:0001550	Biological process	ovarian cumulus expansion	0.018673	1
GO:0002468	Biological process	dendritic cell antigen processing and presentation	0.018673	1
GO:0002577	Biological process	regulation of antigen processing and presentation	0.018673	1
GO:0002578	Biological process	negative regulation of antigen processing and presentation	0.018673	1
GO:0002580	Biological process	regulation of antigen processing and presentation of peptide or polysaccharide antigen via MHC class II	0.018673	1
GO:0002581	Biological process	negative regulation of antigen processing and presentation of peptide or polysaccharide antigen via MHC class II	0.018673	1
GO:0002604	Biological process	regulation of dendritic cell antigen processing and presentation	0.018673	1
GO:0002605	Biological process	negative regulation of dendritic cell antigen processing and presentation	0.018673	1
GO:0007516	Biological process	hemocyte development	0.018673	1
GO:0010459	Biological process	negative regulation of heart rate	0.018673	1
GO:0010748	Biological process	negative regulation of plasma membrane long-chain fatty acid transport	0.018673	1
GO:0010749	Biological process	regulation of nitric oxide mediated signal transduction	0.018673	1
GO:0010751	Biological process	negative regulation of nitric oxide mediated signal transduction	0.018673	1
GO:0010752	Biological process	regulation of cGMP-mediated signaling	0.018673	1
GO:0010754	Biological process	negative regulation of cGMP-mediated signaling	0.018673	1
GO:0010759	Biological process	positive regulation of macrophage chemotaxis	0.018673	1
GO:0010881	Biological process	regulation of cardiac muscle contraction by regulation of the release of sequestered calcium ion	0.018673	1
GO:0015808	Biological process	L-alanine transport	0.018673	1
GO:0019227	Biological process	neuronal action potential propagation	0.018673	1
GO:0030511	Biological process	positive regulation of transforming growth factor beta receptor signaling pathway	0.018673	1
GO:0032230	Biological process	positive regulation of synaptic transmission, GABAergic	0.018673	1
GO:0032328	Biological process	alanine transport	0.018673	1
GO:0032695	Biological process	negative regulation of interleukin-12 production	0.018673	1
GO:0032891	Biological process	negative regulation of organic acid transport	0.018673	1
GO:0042535	Biological process	positive regulation of tumor necrosis factor biosynthetic process	0.018673	1
GO:0043537	Biological process	negative regulation of blood vessel endothelial cell migration	0.018673	1
GO:0043970	Biological process	histone H3-K9 acetylation	0.018673	1
GO:0045636	Biological process	positive regulation of melanocyte differentiation	0.018673	1
GO:0048087	Biological process	positive regulation of developmental pigmentation	0.018673	1
GO:0048165	Biological process	fused antrum stage	0.018673	1
GO:0050942	Biological process	positive regulation of pigment cell differentiation	0.018673	1
GO:0060206	Biological process	estrous cycle phase	0.018673	1
GO:0060775	Biological process	planar cell polarity pathway involved in gastrula mediolateral intercalation	0.018673	1
GO:0071674	Biological process	mononuclear cell migration	0.018673	1
GO:0071675	Biological process	regulation of mononuclear cell migration	0.018673	1
GO:0060348	Biological process	bone development	0.018719	5
GO:0048468	Biological process	cell development	0.018965	30
GO:0007552	Biological process	metamorphosis	0.01958	10
GO:0034728	Biological process	nucleosome organization	0.01958	9
GO:0051240	Biological process	positive regulation of multicellular organismal process	0.01958	9
GO:0048667	Biological process	cell morphogenesis involved in neuron differentiation	0.019589	13
GO:0043547	Biological process	positive regulation of GTPase activity	0.020285	2
GO:0046498	Biological process	S-adenosylhomocysteine metabolic process	0.020285	2
GO:0010243	Biological process	response to organic nitrogen	0.020563	10
GO:0009888	Biological process	tissue development	0.020971	30
GO:0071103	Biological process	DNA conformation change	0.021474	11
GO:0031124	Biological process	mRNA 3'-end processing	0.021477	3
GO:0044236	Biological process	multicellular organismal metabolic process	0.021477	3
GO:0031175	Biological process	neuron projection development	0.021511	14
GO:0006461	Biological process	protein complex assembly	0.021579	27
GO:0003013	Biological process	circulatory system process	0.021793	6
GO:0008015	Biological process	blood circulation	0.021793	6
GO:0070271	Biological process	protein complex biogenesis	0.02235	27
GO:0002009	Biological process	morphogenesis of an epithelium	0.022391	12
GO:0007281	Biological process	germ cell development	0.022931	9
GO:0051258	Biological process	protein polymerization	0.022931	9
GO:0006399	Biological process	tRNA metabolic process	0.023177	10
GO:0048569	Biological process	post-embryonic organ development	0.023451	11
GO:0048666	Biological process	neuron development	0.024106	16
GO:0009101	Biological process	glycoprotein biosynthetic process	0.024133	9
GO:0045471	Biological process	response to ethanol	0.024365	4
GO:0065003	Biological process	macromolecular complex assembly	0.024422	30
GO:0007154	Biological process	cell communication	0.024656	73
GO:0007010	Biological process	cytoskeleton organization	0.025408	23
GO:0000902	Biological process	cell morphogenesis	0.02601	20
GO:0070085	Biological process	glycosylation	0.026017	8
GO:0034621	Biological process	cellular macromolecular complex subunit organization	0.026857	24
GO:0033273	Biological process	response to vitamin	0.027146	4
GO:0046683	Biological process	response to organophosphorus	0.027146	4
GO:0031670	Biological process	cellular response to nutrient	0.027291	2
GO:0042476	Biological process	odontogenesis	0.027291	2
GO:0048134	Biological process	germ-line cyst formation	0.027291	2
GO:0009790	Biological process	embryonic development	0.027749	27
GO:0043434	Biological process	response to peptide hormone stimulus	0.028051	6
GO:0009890	Biological process	negative regulation of biosynthetic process	0.028505	17
GO:0031960	Biological process	response to corticosteroid stimulus	0.028605	4
GO:0001666	Biological process	response to hypoxia	0.02907	5
GO:0045196	Biological process	establishment or maintenance of neuroblast polarity	0.029281	3
GO:0009791	Biological process	post-embryonic development	0.029665	22
GO:0022008	Biological process	neurogenesis	0.02977	21
GO:0017085	Biological process	response to insecticide	0.030109	4
GO:0034330	Biological process	cell junction organization	0.030109	4
GO:0030855	Biological process	epithelial cell differentiation	0.030125	12
GO:0016050	Biological process	vesicle organization	0.030269	5
GO:0000288	Biological process	nuclear-transcribed mRNA catabolic process, deadenylation-dependent decay	0.031107	2
GO:0007044	Biological process	cell-substrate junction assembly	0.031107	2
GO:0031424	Biological process	keratinization	0.031107	2
GO:0034502	Biological process	protein localization to chromosome	0.031107	2
GO:0043406	Biological process	positive regulation of MAP kinase activity	0.031435	3
GO:0007017	Biological process	microtubule-based process	0.031522	16
GO:0007165	Biological process	signal transduction	0.032603	65
GO:0006813	Biological process	potassium ion transport	0.033181	6
GO:0006996	Biological process	organelle organization	0.033913	51
GO:0050794	Biological process	regulation of cellular process	0.034045	136
GO:0035315	Biological process	hair cell differentiation	0.03405	5
GO:0032446	Biological process	protein modification by small protein conjugation	0.034315	15
GO:0048477	Biological process	oogenesis	0.034582	10
GO:0070193	Biological process	synaptonemal complex organization	0.035119	2
GO:0009994	Biological process	oocyte differentiation	0.035373	5
GO:0048599	Biological process	oocyte development	0.035373	5
GO:0007059	Biological process	chromosome segregation	0.035392	6
GO:0007435	Biological process	salivary gland morphogenesis	0.035392	6
GO:0045927	Biological process	positive regulation of growth	0.035584	8
GO:0023060	Biological process	signal transmission	0.035928	70
GO:0000070	Biological process	mitotic sister chromatid segregation	0.035986	3
GO:0023046	Biological process	signaling process	0.036369	70
GO:0000712	Biological process	resolution of meiotic recombination intermediates	0.036999	1
GO:0001502	Biological process	cartilage condensation	0.036999	1
GO:0001826	Biological process	inner cell mass cell differentiation	0.036999	1
GO:0003094	Biological process	glomerular filtration	0.036999	1
GO:0006267	Biological process	pre-replicative complex assembly	0.036999	1
GO:0006655	Biological process	phosphatidylglycerol biosynthetic process	0.036999	1
GO:0006716	Biological process	juvenile hormone metabolic process	0.036999	1
GO:0006718	Biological process	juvenile hormone biosynthetic process	0.036999	1
GO:0007556	Biological process	regulation of juvenile hormone metabolic process	0.036999	1
GO:0007557	Biological process	regulation of juvenile hormone biosynthetic process	0.036999	1
GO:0010746	Biological process	regulation of plasma membrane long-chain fatty acid transport	0.036999	1
GO:0010755	Biological process	regulation of plasminogen activation	0.036999	1
GO:0010757	Biological process	negative regulation of plasminogen activation	0.036999	1
GO:0010796	Biological process	regulation of multivesicular body size	0.036999	1
GO:0010797	Biological process	regulation of multivesicular body size involved in endosome transport	0.036999	1
GO:0010882	Biological process	regulation of cardiac muscle contraction by calcium ion signaling	0.036999	1
GO:0015911	Biological process	plasma membrane long-chain fatty acid transport	0.036999	1
GO:0019043	Biological process	establishment of viral latency	0.036999	1
GO:0019047	Biological process	provirus integration	0.036999	1
GO:0022011	Biological process	myelination in the peripheral nervous system	0.036999	1
GO:0030069	Biological process	lysogeny	0.036999	1
GO:0030421	Biological process	defecation	0.036999	1
GO:0030724	Biological process	testicular fusome organization	0.036999	1
GO:0030852	Biological process	regulation of granulocyte differentiation	0.036999	1
GO:0032287	Biological process	myelin maintenance in the peripheral nervous system	0.036999	1
GO:0032292	Biological process	ensheathment of axons in the peripheral nervous system	0.036999	1
GO:0032512	Biological process	regulation of protein phosphatase type 2B activity	0.036999	1
GO:0032513	Biological process	negative regulation of protein phosphatase type 2B activity	0.036999	1
GO:0032905	Biological process	transforming growth factor-beta1 production	0.036999	1
GO:0032908	Biological process	regulation of transforming growth factor-beta1 production	0.036999	1
GO:0032914	Biological process	positive regulation of transforming growth factor-beta1 production	0.036999	1
GO:0033260	Biological process	DNA replication involved in S phase	0.036999	1
GO:0034505	Biological process	tooth mineralization	0.036999	1
GO:0034763	Biological process	negative regulation of transmembrane transport	0.036999	1
GO:0034766	Biological process	negative regulation of ion transmembrane transport	0.036999	1
GO:0035092	Biological process	sperm chromatin condensation	0.036999	1
GO:0040032	Biological process	post-embryonic body morphogenesis	0.036999	1
GO:0040037	Biological process	negative regulation of fibroblast growth factor receptor signaling pathway	0.036999	1
GO:0042533	Biological process	tumor necrosis factor biosynthetic process	0.036999	1
GO:0042534	Biological process	regulation of tumor necrosis factor biosynthetic process	0.036999	1
GO:0043030	Biological process	regulation of macrophage activation	0.036999	1
GO:0043032	Biological process	positive regulation of macrophage activation	0.036999	1
GO:0043217	Biological process	myelin maintenance	0.036999	1
GO:0045109	Biological process	intermediate filament organization	0.036999	1
GO:0045634	Biological process	regulation of melanocyte differentiation	0.036999	1
GO:0045986	Biological process	negative regulation of smooth muscle contraction	0.036999	1
GO:0048033	Biological process	heme o metabolic process	0.036999	1
GO:0048034	Biological process	heme O biosynthetic process	0.036999	1
GO:0050932	Biological process	regulation of pigment cell differentiation	0.036999	1
GO:0051036	Biological process	regulation of endosome size	0.036999	1
GO:0051307	Biological process	meiotic chromosome separation	0.036999	1
GO:0051458	Biological process	adrenocorticotropin secretion	0.036999	1
GO:0055089	Biological process	fatty acid homeostasis	0.036999	1
GO:0060031	Biological process	mediolateral intercalation	0.036999	1
GO:0060087	Biological process	relaxation of vascular smooth muscle	0.036999	1
GO:0070212	Biological process	protein amino acid poly-ADP-ribosylation	0.036999	1
GO:0070213	Biological process	protein amino acid auto-ADP-ribosylation	0.036999	1
GO:0071622	Biological process	regulation of granulocyte chemotaxis	0.036999	1
GO:0007560	Biological process	imaginal disc morphogenesis	0.038304	8
GO:0000819	Biological process	sister chromatid segregation	0.038382	3
GO:0006730	Biological process	one-carbon metabolic process	0.038907	11
GO:0000098	Biological process	sulfur amino acid catabolic process	0.03932	2
GO:0030574	Biological process	collagen catabolic process	0.03932	2
GO:0042386	Biological process	hemocyte differentiation	0.03932	2
GO:0051924	Biological process	regulation of calcium ion transport	0.03932	2
GO:0048511	Biological process	rhythmic process	0.039529	5
GO:0048812	Biological process	neuron projection morphogenesis	0.039624	12
GO:0035317	Biological process	imaginal disc-derived wing hair organization	0.040104	4
GO:0001568	Biological process	blood vessel development	0.040192	8
GO:0022412	Biological process	reproductive cellular process in multicellular organism	0.040391	11
GO:0055057	Biological process	neuroblast division	0.040856	3
GO:0055059	Biological process	asymmetric neuroblast division	0.040856	3
GO:0070482	Biological process	response to oxygen levels	0.040978	5
GO:0023052	Biological process	signaling	0.041434	71
GO:0051239	Biological process	regulation of multicellular organismal process	0.041507	24
GO:0035316	Biological process	non-sensory hair organization	0.041933	4
GO:0000904	Biological process	cell morphogenesis involved in differentiation	0.042318	14
GO:0007584	Biological process	response to nutrient	0.042586	6
GO:0007443	Biological process	Malpighian tubule morphogenesis	0.04341	3
GO:0008585	Biological process	female gonad development	0.04341	3
GO:0072002	Biological process	Malpighian tubule development	0.04341	3
GO:0001541	Biological process	ovarian follicle development	0.0437	2
GO:0002065	Biological process	columnar/cuboidal epithelial cell differentiation	0.0437	2
GO:0008362	Biological process	chitin-based embryonic cuticle biosynthetic process	0.0437	2
GO:0031638	Biological process	zymogen activation	0.0437	2
GO:0001503	Biological process	ossification	0.043807	4
GO:0007423	Biological process	sensory organ development	0.043956	12
GO:0034656	Biological process	nucleobase, nucleoside and nucleotide catabolic process	0.044071	10
GO:0030036	Biological process	actin cytoskeleton organization	0.044682	13
GO:0007431	Biological process	salivary gland development	0.045174	6
GO:0001944	Biological process	vasculature development	0.045181	8
GO:0031327	Biological process	negative regulation of cellular biosynthetic process	0.04531	16
GO:0009913	Biological process	epidermal cell differentiation	0.045347	7
GO:0019915	Biological process	lipid storage	0.045728	4
GO:0009100	Biological process	glycoprotein metabolic process	0.045943	9
GO:0008258	Biological process	head involution	0.046041	3
GO:0045765	Biological process	regulation of angiogenesis	0.046041	3
GO:0048619	Biological process	embryonic hindgut morphogenesis	0.046041	3
GO:0016055	Biological process	Wnt receptor signaling pathway	0.046503	6
GO:0007292	Biological process	female gamete generation	0.047593	10
GO:0007018	Biological process	microtubule-based movement	0.047702	7
GO:0048514	Biological process	blood vessel morphogenesis	0.047702	7
GO:0051276	Biological process	chromosome organization	0.048542	22
GO:0043269	Biological process	regulation of ion transport	0.048749	3
GO:0007155	Biological process	cell adhesion	0.048986	15
GO:0050793	Biological process	regulation of developmental process	0.049941	21
GO:0030016	Cellular component	myofibril	0.00018773	11
GO:0043292	Cellular component	contractile fiber	0.00027929	11
GO:0030017	Cellular component	sarcomere	0.0005036	10
GO:0044449	Cellular component	contractile fiber part	0.00077264	10
GO:0030014	Cellular component	CCR4-NOT complex	0.0022453	2
GO:0005890	Cellular component	sodium:potassium-exchanging ATPase complex	0.0023519	4
GO:0043230	Cellular component	extracellular organelle	0.0054687	2
GO:0065010	Cellular component	extracellular membrane-bounded organelle	0.0054687	2
GO:0070062	Cellular component	extracellular vesicular exosome	0.0054687	2
GO:0005736	Cellular component	DNA-directed RNA polymerase I complex	0.0099462	2
GO:0033017	Cellular component	sarcoplasmic reticulum membrane	0.012623	2
GO:0000776	Cellular component	kinetochore	0.013562	5
GO:0005590	Cellular component	collagen type VII	0.019625	1
GO:0005600	Cellular component	collagen type XIII	0.019625	1
GO:0030478	Cellular component	actin cap	0.019625	1
GO:0030934	Cellular component	anchoring collagen	0.019625	1
GO:0030936	Cellular component	transmembrane collagen	0.019625	1
GO:0044427	Cellular component	chromosomal part	0.021451	22
GO:0000785	Cellular component	chromatin	0.025165	16
GO:0005694	Cellular component	chromosome	0.025944	25
GO:0032993	Cellular component	protein-DNA complex	0.026027	8
GO:0005856	Cellular component	cytoskeleton	0.027009	35
GO:0000786	Cellular component	nucleosome	0.030609	7
GO:0005720	Cellular component	nuclear heterochromatin	0.030877	3
GO:0005887	Cellular component	integral to plasma membrane	0.03366	14
GO:0035060	Cellular component	brahma complex	0.034076	2
GO:0044454	Cellular component	nuclear chromosome part	0.034528	7
GO:0043228	Cellular component	non-membrane-bounded organelle	0.035908	89
GO:0043232	Cellular component	intracellular non-membrane-bounded organelle	0.035908	89
GO:0035098	Cellular component	ESC/E(Z) complex	0.038448	2
GO:0000214	Cellular component	tRNA-intron endonuclease complex	0.038866	1
GO:0005656	Cellular component	pre-replicative complex	0.038866	1
GO:0031082	Cellular component	BLOC complex	0.038866	1
GO:0031083	Cellular component	BLOC-1 complex	0.038866	1
GO:0033269	Cellular component	internode region of axon	0.038866	1
GO:0045098	Cellular component	type III intermediate filament	0.038866	1
GO:0070969	Cellular component	ULK1-ATG13-FIP200 complex	0.038866	1
GO:0044430	Cellular component	cytoskeletal part	0.039389	28
GO:0000780	Cellular component	condensed nuclear chromosome, centromeric region	0.04302	2
GO:0031226	Cellular component	intrinsic to plasma membrane	0.044663	14
GO:0000793	Cellular component	condensed chromosome	0.045468	5
GO:0045171	Cellular component	intercellular bridge	0.047783	2
GO:0045172	Cellular component	germline ring canal	0.047783	2
GO:0005515	Molecular function	protein binding	0.00014281	205
GO:0008466	Molecular function	glycogenin glucosyltransferase activity	0.00026775	3
GO:0005391	Molecular function	sodium:potassium-exchanging ATPase activity	0.0033265	4
GO:0004197	Molecular function	cysteine-type endopeptidase activity	0.0048585	9
GO:0008234	Molecular function	cysteine-type peptidase activity	0.005421	11
GO:0008556	Molecular function	potassium-transporting ATPase activity	0.0057545	4
GO:0004013	Molecular function	adenosylhomocysteinase activity	0.0061925	3
GO:0005542	Molecular function	folic acid binding	0.0061925	3
GO:0016802	Molecular function	trialkylsulfonium hydrolase activity	0.0061925	3
GO:0003924	Molecular function	GTPase activity	0.0075968	15
GO:0015662	Molecular function	ATPase activity, coupled to transmembrane movement of ions, phosphorylative mechanism	0.0089209	8
GO:0005536	Molecular function	glucose binding	0.010463	2
GO:0005540	Molecular function	hyaluronic acid binding	0.010463	2
GO:0008379	Molecular function	thioredoxin peroxidase activity	0.010463	2
GO:0005509	Molecular function	calcium ion binding	0.011813	23
GO:0008194	Molecular function	UDP-glycosyltransferase activity	0.017771	8
GO:0000213	Molecular function	tRNA-intron endonuclease activity	0.020144	1
GO:0004586	Molecular function	ornithine decarboxylase activity	0.020144	1
GO:0004951	Molecular function	cholecystokinin receptor activity	0.020144	1
GO:0005052	Molecular function	peroxisome matrix targeting signal-1 binding	0.020144	1
GO:0005280	Molecular function	hydrogen:amino acid symporter activity	0.020144	1
GO:0005302	Molecular function	L-tyrosine transmembrane transporter activity	0.020144	1
GO:0005360	Molecular function	insulin-responsive hydrogen:glucose symporter activity	0.020144	1
GO:0008046	Molecular function	axon guidance receptor activity	0.020144	1
GO:0015054	Molecular function	gastrin receptor activity	0.020144	1
GO:0015173	Molecular function	aromatic amino acid transmembrane transporter activity	0.020144	1
GO:0015180	Molecular function	L-alanine transmembrane transporter activity	0.020144	1
GO:0017112	Molecular function	Rab guanyl-nucleotide exchange factor activity	0.020144	1
GO:0019780	Molecular function	FAT10 activating enzyme activity	0.020144	1
GO:0022858	Molecular function	alanine transmembrane transporter activity	0.020144	1
GO:0031628	Molecular function	opioid receptor binding	0.020144	1
GO:0031852	Molecular function	mu-type opioid receptor binding	0.020144	1
GO:0032033	Molecular function	myosin II light chain binding	0.020144	1
GO:0032038	Molecular function	myosin II heavy chain binding	0.020144	1
GO:0034647	Molecular function	histone demethylase activity (H3-trimethyl-K4 specific)	0.020144	1
GO:0043992	Molecular function	histone acetyltransferase activity (H3-K9 specific)	0.020144	1
GO:0048603	Molecular function	fibroblast growth factor 2 binding	0.020144	1
GO:0070052	Molecular function	collagen V binding	0.020144	1
GO:0005539	Molecular function	glycosaminoglycan binding	0.020581	4
GO:0016801	Molecular function	hydrolase activity, acting on ether bonds	0.022046	3
GO:0015079	Molecular function	potassium ion transmembrane transporter activity	0.024021	6
GO:0019829	Molecular function	cation-transporting ATPase activity	0.025658	9
GO:0003756	Molecular function	protein disulfide isomerase activity	0.026153	3
GO:0004619	Molecular function	phosphoglycerate mutase activity	0.027274	2
GO:0008270	Molecular function	zinc ion binding	0.033023	62
GO:0016862	Molecular function	intramolecular oxidoreductase activity, interconverting keto- and enol-groups	0.033025	3
GO:0017022	Molecular function	myosin binding	0.036313	4
GO:0000268	Molecular function	peroxisome targeting sequence binding	0.039883	1
GO:0003726	Molecular function	double-stranded RNA adenosine deaminase activity	0.039883	1
GO:0005356	Molecular function	hydrogen:glucose symporter activity	0.039883	1
GO:0008495	Molecular function	protoheme IX farnesyltransferase activity	0.039883	1
GO:0009679	Molecular function	hexose:hydrogen symporter activity	0.039883	1
GO:0010484	Molecular function	H3 histone acetyltransferase activity	0.039883	1
GO:0030156	Molecular function	benzodiazepine receptor binding	0.039883	1
GO:0030172	Molecular function	troponin C binding	0.039883	1
GO:0045159	Molecular function	myosin II binding	0.039883	1
GO:0046935	Molecular function	1-phosphatidylinositol-3-kinase regulator activity	0.039883	1
GO:0050431	Molecular function	transforming growth factor beta binding	0.039883	1
GO:0055056	Molecular function	D-glucose transmembrane transporter activity	0.039883	1
GO:0071614	Molecular function	linoleic acid epoxygenase activity	0.039883	1
GO:0005217	Molecular function	intracellular ligand-gated ion channel activity	0.040331	2
GO:0032027	Molecular function	myosin light chain binding	0.040741	3
GO:0003724	Molecular function	RNA helicase activity	0.046345	3
GO:0008375	Molecular function	acetylglucosaminyltransferase activity	0.046345	3
